# Supplementary material
Source: Elsevier journal article supplement (https://www.sciencedirect.com/science/article/pii/S0213911119302511)
Supplement: mmc1 [file S0213911119302511:mmc1.docx]

**Appendix**

**Collateral casualties per 100 car drivers responsible for road crashes in Spain from 2009 to 2013, according to driver’s age and type of crash**

|  |  | | | **Total CC** | | **Deaths** | | **Severe injuries** | | **Mild injuries** | |
| --- | --- | --- | --- | --- | --- | --- | --- | --- | --- | --- | --- |
| **Age** | **No. of drivers** | | | **CC per 100 responsible users** | **Rate ratio of CC** | **CC per 100 responsible users** | **Rate ratio of CC** | **CC per 100 responsible users** | **Rate ratio of CC** | **CC per 100 responsible users** | **Rate ratio of CC** |
| *Single crash* | | | |  | |  | |  | |  | |
| <25 years | | | 14950 | 72.8 | 1.54 | 1.3 | 1.77 | 8.2 | 1.71 | 63.3 | 1.52 |
| 25 to 34 years | | | 18850 | 47.2 | 1 (Ref.) | 0.7 | 1 (Ref.) | 4.8 | 1 (Ref.) | 41.6 | 1 (Ref.) |
| 35 to 64 years | | | 25555 | 47.9 | 1.01 | 1.0 | 1.39 | 5.1 | 1.07 | 41.7 | 1.00 |
| >64 years | | | 5436 | 54.3 | 1.15 | 2.2 | 3.01 | 7.9 | 1.64 | 44.2 | 1.06 |
|  | | |  |  |  |  |  |  |  |  |  |
| *Vehicle collisions* | | | |  |  |  |  |  |  |  |  |
| <25 years | | 12849 | | 146.7 | 1.05 | 1.4 | 1.18 | 10.1 | 1.26 | 135.2 | 1.03 |
| 25 to 34 years | | 20696 | | 140.2 | 1 (Ref.) | 1.1 | 1 (Ref.) | 8.0 | 1 (Ref.) | 131.0 | 1 (Ref.) |
| 35 to 64 years | | 36424 | | 136.7 | 0.98 | 0.8 | 0.70 | 7.9 | 0.99 | 128.0 | 0.98 |
| >64 years | | 8193 | | 134.4 | 0.96 | 1.0 | 0.88 | 10.1 | 1.26 | 123.3 | 0.94 |
|  | |  | |  |  |  |  |  |  |  |  |
| *Collisions involving pedestrians* | |  | |  |  |  |  |  |  |  |  |
| <25 years | | 1936 | | 114.2 | 1.03 | 3.1 | 1.18 | 24.8 | 1.22 | 86.2 | 0.98 |
| 25 to 34 years | | 3383 | | 111.1 | 1 (Ref.) | 2.6 | 1 (Ref.) | 20.4 | 1 (Ref.) | 88.1 | 1 (Ref.) |
| 35 to 64 years | | 8051 | | 110.1 | 0.99 | 1.7 | 0.65 | 20.6 | 1.01 | 87.8 | 1.00 |
| >64 years | | 2155 | | 110.0 | 0.99 | 1.8 | 0.69 | 23.4 | 1.15 | 84.8 | 0.96 |

CC: collateral casualties.
